# Supplementary material
Source: PubMed Central journal article supplement (PMC3226375)
Supplement: supp_111.041012_Hardwick_Suppl_Data_DMD41012.pdf [file supp_111.041012_Hardwick_Suppl_Data_DMD41012.pdf]

**VARIATIONS IN ABC TRANSPORTER REGULATION DURING THE  
PROGRESSION OF HUMAN NON-ALCOHOLIC FATTY LIVER DISEASE**

Rhiannon N. Hardwick, Craig D. Fisher, Mark J. Canet, George L. Scheffer, Nathan J.  
Cherrington

Supplemental Data Table 1.

Human Oligonucleotide Probe Sets.

| Gene   | Function | Probe Sequence                                  |
|--------|----------|-------------------------------------------------|
| ABCC1  | CE       | ttgcttcctccctggaccTTTTTctcttgaaagaaagt          |
| (MRP1) | CE       | tgcaattctgcggtgctgtTTTTTctcttgaaagaaagt         |
|        | CE       | ccttcttggcctcagctttcTTTTTctcttgaaagaaagt        |
|        | CE       | cggaaagcttgacctgccctTTTTTctcttgaaagaaagt        |
|        | CE       | gctgagccaatagttggaagcTTTTTctcttgaaagaaagt       |
|        | LE       | cgttctcctctgcatcctgcTTTTTtaggcataggaccctgtct    |
|        | LE       | gctgacgccctgacctTTTTTtaggcataggaccctgtct        |
|        | LE       | gcatgccattctccatttgcTTTTTtaggcataggaccctgtct    |
|        | LE       | ccactataggaggaggagctgctTTTTTtaggcataggaccctgtct |
|        | LE       | tgtggtgcctgctgatgtccTTTTTtaggcataggaccctgtct    |
|        | LE       | ccatcagctccaggtctcctTTTTTtaggcataggaccctgtct    |
|        | LE       | gtctgcgccttgcagcctTTTTTtaggcataggaccctgtct      |
|        | LE       | ggccttcatgtagtcccagtacaTTTTTtaggcataggaccctgtct |
|        | LE       | cagcgcggacacatggttTTTTTtaggcataggaccctgtct      |

DMD #41012

|        |    |                                                  |
|--------|----|--------------------------------------------------|
|        | LE | cgatggggtcatcagtcagagTTTTTaggcataggaccgtgtct     |
|        | LE | gtgctcctgagtccegttgaTTTTTaggcataggaccgtgtct      |
|        | BL | cctgcactgtccgtcacca                              |
|        | BL | gagctgtctctgcagttgcttc                           |
|        | BL | ggaaggagatgaagatccgat                            |
|        | BL | acacatgaaaaggaagatgctga                          |
| ABCC2  | CE | cagctctctctcatgtgcgtttTTTTctcttggaaagaaagt       |
| (MRP2) | CE | ttctcctgccgtctctggagtTTTTctcttggaaagaaagt        |
|        | CE | ggctttgactctgattctgttcaTTTTctcttggaaagaaagt      |
|        | CE | caatttcagcagctgaggactcTTTTctcttggaaagaaagt       |
|        | CE | cagaaagactgaatgagagccgTTTTctcttggaaagaaagt       |
|        | LE | gcccgcctggctttctgTTTTTaggcataggaccgtgtct         |
|        | LE | ccagagtctgctgggagctcTTTTTaggcataggaccgtgtct      |
|        | LE | agccaggcagcctggctTTTTTaggcataggaccgtgtct         |
|        | LE | ttccaggacagggcatctTTTTTaggcataggaccgtgtct        |
|        | LE | gactctttttctttcaacatcTTTTTaggcataggaccgtgtct     |
|        | LE | agcctcatcaaccaggattttTTTTTaggcataggaccgtgtct     |
|        | LE | gcttcagtaggaatgattcaggaTTTTTaggcataggaccgtgtct   |
|        | LE | gatatccaatccacaatatgtgtcaTTTTTaggcataggaccgtgtct |
|        | BL | ggaacatctttttgtcca                               |
|        | BL | gcacatgtagaaagtttgaacag                          |
|        | BL | acaacgtgaagatctcattcacta                         |
|        | BL | cggcacttgcaaaggagatcag                           |
|        | BL | cagtgaataagaggattgcacaga                         |

DMD #41012

|        |    |                                                |
|--------|----|------------------------------------------------|
| ABCC3  | CE | cctccaggtgcccttggTTTTTctcttgaaagaaagt          |
| (MRP3) | CE | gcctccttaccctctgcacctTTTTTctcttgaaagaaagt      |
|        | CE | ctcagctgtctcataaactgctctTTTTTctcttgaaagaaagt   |
|        | CE | gccaatggctgctttctctTTTTTctcttgaaagaaagt        |
|        | CE | cgccagcctcaggaagTTTTTctcttgaaagaaagt           |
|        | CE | gaagaaggaattgagcagcatTTTTTctcttgaaagaaagt      |
|        | LE | ccaacgcgggtccagctgtTTTTTaggcataggaccctgtct     |
|        | LE | tgctgtcagatccgtgtggtTTTTTaggcataggaccctgtct    |
|        | LE | cccactcaggacagggcaTTTTTaggcataggaccctgtct      |
|        | LE | ggccgaccctgtccctTTTTTaggcataggaccctgtct        |
|        | LE | tgcttcgcctctgtcaccTTTTTaggcataggaccctgtct      |
|        | LE | cagaacacactgagctccacagtTTTTTaggcataggaccctgtct |
|        | LE | ccagcgtggtacagagcccTTTTTaggcataggaccctgtct     |
|        | LE | cccacatacaggagacagatggTTTTTaggcataggaccctgtct  |
|        | LE | atggcagccgcactttgaTTTTTaggcataggaccctgtct      |
|        | LE | tgagccacacattggctccaTTTTTaggcataggaccctgtct    |
|        | LE | ggcatcattgtccaggcacTTTTTaggcataggaccctgtct     |
|        | LE | tggtgtctgtctactgtctgcatTTTTTaggcataggaccctgtct |
|        | LE | ccagcatcaccaagaaccctTTTTTaggcataggaccctgtct    |
|        | LE | ggtgcaacacacgggcagTTTTTaggcataggaccctgtct      |
|        | LE | aaggactgtggcgagcgtatTTTTTaggcataggaccctgtct    |
|        | LE | gcctgatggtgtggtgtcaaagTTTTTaggcataggaccctgtct  |
|        | LE | cctcatcaacgacatagatgcctTTTTTaggcataggaccctgtct |
|        | BL | gctgagtgtcttcaatcagcagt                        |
|        | BL | ggaccacatagggtgactggatcat                      |
|        | BL | aggtgcctccgggtaca                              |

DMD #41012

|        |    |                                                   |
|--------|----|---------------------------------------------------|
|        | BL | tgcacctctctgatggacct                              |
|        | BL | cctgggtcagtgccccatc                               |
|        | BL | cacggccttggcataatcc                               |
|        | BL | gcagaattcctaaagcagcataga                          |
|        | BL | tgccatggccatggctg                                 |
|        | BL | cctggatgccaccgc                                   |
|        | BL | cttgttgagcagcagtcct                               |
|        | BL | ggagaagcagtcaggatgcg                              |
|        | BL | aggatgacagggccagaa                                |
| ABCC4  | CE | ggtagggcgtttctgatattccTTTTTctcttgaaagaaagt        |
| (MRP4) | CE | cctttctgtgatttaagagtcTTTTTctcttgaaagaaagt         |
|        | CE | gaggaacttttccagctccTTTTTctcttgaaagaaagt           |
|        | CE | tccaaatttaccttcgggtcTTTTTctcttgaaagaaagt          |
|        | CE | acaggttctgaggtatgattgacTTTTTctcttgaaagaaagt       |
|        | CE | ctcattaaaggatccaggtttTTTTTctcttgaaagaaagt         |
|        | LE | tgtgtattcaatgaccttctactgTTTTTtagcataggaccgtgtct   |
|        | LE | caaggtgctcttttcaagtcTTTTTtagcataggaccgtgtct       |
|        | LE | gtcagatgcttcagtaccagaggTTTTTtagcataggaccgtgtct    |
|        | LE | ggttcttcccacaatgcaaTTTTTtagcataggaccgtgtct        |
|        | LE | tgacaatctaaaaagggtgagaTTTTTTtagcataggaccgtgtct    |
|        | LE | caatttcagttgtcaagatctatcaaTTTTTtagcataggaccgtgtct |
|        | LE | ccacagttcctcatccgtgtTTTTTtagcataggaccgtgtct       |
|        | BL | catggggccaggctgt                                  |
|        | BL | cacattgtcaaagattatcactcct                         |
|        | BL | cccacctggactgtacatgaagt                           |

DMD #41012

|        |    |                                                                                                 |
|--------|----|-------------------------------------------------------------------------------------------------|
|        | BL | at tt t t c t c t t a a a t c g t g a a g t c                                                   |
|        | BL | t c t c a t t g t t c c a g t g a a c a a a                                                     |
| ABCC5  | CE | c g g c t c g g g c t g c t g t t T T T T T c t c t t g g a a g a a a g t                       |
| (MRP5) | CE | t t c t g a g c t g a g a a t g c a t g g a T T T T T c t c t t g g a a g a a a g t             |
|        | CE | g g a t g g g c t t c a g a g c a c t c a T T T T T c t c t t g g a a g a a a g t               |
|        | CE | c a g g a g g a g g t g g c c t t t c t T T T T T c t c t t g g a a g a a a g t                 |
|        | CE | c t c c a g a t c g a t g c t g t c a T T T T T c t c t t g g a a g a a a g t                   |
|        | CE | a t g a g g a t t g c c t t c a t g c t g T T T T T c t c t t g g a a g a a a g t               |
|        | CE | t g a c t g c c a t g g a g a g g g c T T T T T c t c t t g g a a g a a a g t                   |
|        | LE | g g c a t c a a g a g a g a g g c c c T T T T T T a g g c a t a g g a c c c g t g t c t         |
|        | LE | g g g a t g c t c c t c a t c c a g g a T T T T T a g g c a t a g g a c c c g t g t c t         |
|        | LE | a g c c a t g a t g t a c t t t c c c t t T T T T T a g g c a t a g g a c c c g t g t c t       |
|        | LE | g t c t g c c a g c a c c g c t T T T T T a g g c a t a g g a c c c g t g t c t                 |
|        | LE | g g g c c g c t c g t c a c t g t c T T T T T a g g c a t a g g a c c c g t g t c t             |
|        | LE | g g c c c a g g t g g a t g t g c t t T T T T T a g g c a t a g g a c c c g t g t c t           |
|        | LE | g t g t c t c t g t a a g c g c a g g t T T T T T a g g c a t a g g a c c c g t g t c t         |
|        | LE | t c a c t c a c c a g g t c t c g t t c T T T T T a g g c a t a g g a c c c g t g t c t         |
|        | LE | g t a g a t g c t g g c a t a g t a c t g c a t T T T T T a g g c a t a g g a c c c g t g t c t |
|        | LE | g a a t g g c t t t c a g g a t c a g c a T T T T T a g g c a t a g g a c c c g t g t c t       |
| ABCC6  | CE | g t t g a t t t c c a a a g a g c g a T T T T T c t c t t g g a a g a a a g t                   |
| (MRP6) | CE | g g a c t c c t t t t c t c t c g g T T T T T c t c t t g g a a g a a a g t                     |
|        | CE | g g t c g c t c t g g a a g c c c g T T T T T c t c t t g g a a g a a a g t                     |
|        | CE | g g t t g a t c c g c c a g g c a T T T T T c t c t t g g a a g a a a g t                       |
|        | LE | c a g g a c t a t g a g g g c g a a t c c T T T T T a g g c a t a g g a c c c g t g t c t       |

DMD #41012

LE cagccacgctggaggtacaTTTTTaggcataggaccgtgtct  
LE ggcctcaggcgtccctTTTTTaggcataggaccgtgtct  
LE gctcatcgtggtgagccacTTTTTaggcataggaccgtgtct  
LE ccaaacagcactccagatgactTTTTTaggcataggaccgtgtct  
LE gcagcgttgtagctggcTTTTTaggcataggaccgtgtct  
LE tggacaggtggcggacagTTTTTaggcataggaccgtgtct  
LE caccagagacaggcataggtaggTTTTTaggcataggaccgtgtct  
LE ggacagcacaactgtccacTTTTTaggcataggaccgtgtct  
BL agtaggatgaatgaggaattctgg  
BL tgtaatcaggaactgcgaa  
BL aagacaaagcagagaagccagtaa  
BL tccggaggcctgctgg  
  
ABCB1 CE tgtaatagctttctttatccaattcTTTTTctcttgaaagaaagt  
(P-gp) CE gcagcacctatagaaatattggcTTTTTctcttgaaagaaagt  
CE tcataagctgctcctcttgcattTTTTTctcttgaaagaaagt  
CE ttctttcagatgggtaactgaTTTTTctcttgaaagaaagt  
LE ttttagcttctctaaatgttgaTTTTTTaggcataggaccgtgtct  
LE ctgagaggaccaagtggtccTTTTTTaggcataggaccgtgtct  
LE gagatgcctgtccaactaaaagTTTTTTaggcataggaccgtgtct  
LE ttgcaaatgctcaatgctgTTTTTTaggcataggaccgtgtct  
LE tccctaatattatctggttgtgcTTTTTTaggcataggaccgtgtct  
LE ggttcagaccctcaagatctaacTTTTTTaggcataggaccgtgtct  
LE tgcccactctgcacettcaTTTTTTaggcataggaccgtgtct  
LE ccaaccagggccaccgtcTTTTTTaggcataggaccgtgtct  
BL aagatgcatagatcagcagaaa

DMD #41012

BL            cataccagaaggccagagcat  
BL            tgagtactgtccaatagaatattccc  
BL            cccaattaatacagaaaagaatacag  
BL            tggcttattatcaattatcttgaagatt  
BL            ccactctcgaatagctgtcaataact  
BL            agtgaacatttctgaattccaatt

ABCG2

(BCRP)

CE            gcctcctgccgctctTTTTTctcttgaaagaaagt  
CE            acggtgcgctcctaaatcctaTTTTTctcttgaaagaaagt  
CE            caggatgctgctgctcgTTTTTctcttgaaagaaagt  
CE            tctttcagcttaatagagctcggTTTTTctcttgaaagaaagt  
CE            caggttcatgatcccattgataTTTTTctcttgaaagaaagt  
LE            cccagttcctccacaggctTTTTTaggcataggaccggtgtct  
LE            acaagaccaccaagcatgtgcTTTTTaggcataggaccggtgtct  
LE            gaggcagcgcttaacaattaaTTTTTaggcataggaccggtgtct  
LE            cactgggataaaaactcgcacattaTTTTTaggcataggaccggtgtct  
LE            cagtaaatgccttcaggtcattgTTTTTaggcataggaccggtgtct  
LE            ttcgataatatttcttctcaactggTTTTTaggcataggaccggtgtct  
LE            cccaggatggcgttgagacTTTTTaggcataggaccggtgtct  
BL            ctcaatctcagtgggagtggc  
BL            ctctaaagcagcagttccactta  
BL            cccggacctccaacaaa  
BL            ggatgtaaagtgtgggatgagtca  
BL            tcttaaccaaaggctcaggatct  
BL            ctggaagacatctggagagtttta

DMD #41012

|    |                           |
|----|---------------------------|
| BL | gccattggtgttccttgtga      |
| BL | gaagctgtcgcggggaa         |
| BL | gttatgaaaactaacacagctcct  |
| BL | ctcttcagtttactcgatagcagat |
| BL | tttcgacaaggtagaaagcca     |
| BL | ttgcctccacctgtgggt        |
